# Supplementary material for: LC-MS Analysis of Serum for the Metabolomic Investigation of the Effects of Pulchinenoside b4 Administration in Monosodium Urate Crystal-Induced Gouty Arthritis Rat Model
Source: PubMed Central journal article supplement (PMC6749452; doi:10.3390/molecules24173161), 2019-08-30
Supplement: molecules-24-03161-s001.pdf [file molecules-24-03161-s001.pdf]

## Supplementary Material:

**Table S1.** Detailed structure elucidation data (NMR) of P-b4.

| Description( <sup>1</sup> H-NMR,600 MHz, C5D5N)                                                                                                                                                                                                                                                                                                                                                                             |                |               |                |
|-----------------------------------------------------------------------------------------------------------------------------------------------------------------------------------------------------------------------------------------------------------------------------------------------------------------------------------------------------------------------------------------------------------------------------|----------------|---------------|----------------|
| White amorphous powder, <sup>1</sup> H-NMR (600 MHz, C5D5N) $\delta$ : 1.72 (3H, s, H-30), 1.03 (3H, s, H-27), 0.977 (3H, s, H-26), 0.91 (3H, s, H-25), 0.69 (3H, s, H-24), 1.25 (3H, d, J=6.0 Hz, 6-H3 of rha), 1.27 (3H, d, J=6.6 Hz, 6'-H3 of rha), 4.57(1H, d, J=4.8Hz, H-1 of ara), 4.75 (1H, brs, 1'-H of rha), 5.17 (1H, brs, 1-H of rha), 5.48 (1H, d, J=8.4Hz, 1'-H of glc), 4.40 (1H, d, J=7.8 Hz, 1''-H of glc). |                |               |                |
| Data( <sup>13</sup> C-NMR,150 MHz, C5D5N)                                                                                                                                                                                                                                                                                                                                                                                   |                |               |                |
| Aglycone                                                                                                                                                                                                                                                                                                                                                                                                                    |                | Glycosyl      |                |
| Carbon                                                                                                                                                                                                                                                                                                                                                                                                                      | Chemical Shift | Carbon        | Chemical Shift |
| 1                                                                                                                                                                                                                                                                                                                                                                                                                           | 39.33          | C3-O-         |                |
| 2                                                                                                                                                                                                                                                                                                                                                                                                                           | 26.48          | <b>Rha-1</b>  | 101.73         |
| 3                                                                                                                                                                                                                                                                                                                                                                                                                           | 81.16          | 2             | 72.43          |
| 4                                                                                                                                                                                                                                                                                                                                                                                                                           | 42.84          | 3             | 72.61          |
| 5                                                                                                                                                                                                                                                                                                                                                                                                                           | 47.84          | 4             | 74.19          |
| 6                                                                                                                                                                                                                                                                                                                                                                                                                           | 18.19          | 5             | 69.45          |
| 7                                                                                                                                                                                                                                                                                                                                                                                                                           | 34.31          | 6             | 18.64          |
| 8                                                                                                                                                                                                                                                                                                                                                                                                                           | 41.20          | <b>Ara-1</b>  | 104.43         |
| 9                                                                                                                                                                                                                                                                                                                                                                                                                           | 51.01          | 2             | 75.85          |
| 10                                                                                                                                                                                                                                                                                                                                                                                                                          | 36.95          | 3             | 74.83          |
| 11                                                                                                                                                                                                                                                                                                                                                                                                                          | 21.21          | 4             | 69.49          |
| 12                                                                                                                                                                                                                                                                                                                                                                                                                          | 26.08          | 5             | 65.77          |
| 13                                                                                                                                                                                                                                                                                                                                                                                                                          | 38.38          | C28-O-        |                |
| 14                                                                                                                                                                                                                                                                                                                                                                                                                          | 43.68          | Glc-1'        | 95.33          |
| 15                                                                                                                                                                                                                                                                                                                                                                                                                          | 30.88          | 2'            | 74.15          |
| 16                                                                                                                                                                                                                                                                                                                                                                                                                          | 32.32          | 3'            | 78.20          |
| 17                                                                                                                                                                                                                                                                                                                                                                                                                          | 57.03          | 4'            | 70.88          |
| 18                                                                                                                                                                                                                                                                                                                                                                                                                          | 47.92          | 5'            | 78.07          |
| 19                                                                                                                                                                                                                                                                                                                                                                                                                          | 49.83          | 6'            | 61.35          |
| 20                                                                                                                                                                                                                                                                                                                                                                                                                          | 150.87         | Glc-1''       | 105.21         |
| 21                                                                                                                                                                                                                                                                                                                                                                                                                          | 30.26          | 2'            | 75.38          |
| 22                                                                                                                                                                                                                                                                                                                                                                                                                          | 37.07          | 3'            | 76.50          |
| 23                                                                                                                                                                                                                                                                                                                                                                                                                          | 63.95          | 4'            | 78.76          |
| 24                                                                                                                                                                                                                                                                                                                                                                                                                          | 13.87          | 5'            | 77.24          |
| 25                                                                                                                                                                                                                                                                                                                                                                                                                          | 17.04          | 6'            | 69.78          |
| 26                                                                                                                                                                                                                                                                                                                                                                                                                          | 16.47          | <b>Rha-1'</b> | 102.77         |
| 27                                                                                                                                                                                                                                                                                                                                                                                                                          | 14.95          | 2'            | 72.66          |
| 28                                                                                                                                                                                                                                                                                                                                                                                                                          | 175.01         | 3'            | 72.84          |
| 29                                                                                                                                                                                                                                                                                                                                                                                                                          | 110.19         | 4'            | 74.05          |
| 30                                                                                                                                                                                                                                                                                                                                                                                                                          | 19.45          | 5'            | 70.38          |
|                                                                                                                                                                                                                                                                                                                                                                                                                             |                | 6'            | 18.62          |

**Table S2.** The R<sup>2</sup> and Q<sup>2</sup> of 12 OPLS-DA models.

| <b>Project</b> | <b>R<sup>2</sup>X</b> | <b>R<sup>2</sup>Y</b> | <b>Q<sup>2</sup></b> |
|----------------|-----------------------|-----------------------|----------------------|
| POS-C9-D9      | 0.386                 | 0.999                 | 0.951                |
| POS-C9-M9      | 0.38                  | 0.996                 | 0.961                |
| POS-C24-D24    | 0.386                 | 0.995                 | 0.956                |
| POS-C24-M24    | 0.409                 | 0.989                 | 0.948                |
| POS-D9-M9      | 0.268                 | 0.984                 | 0.854                |
| POS-D24-M24    | 0.418                 | 0.988                 | 0.77                 |
| NEG-C9-D9      | 0.536                 | 0.996                 | 0.962                |
| NEG-C9-M9      | 0.415                 | 0.983                 | 0.939                |
| NEG-C24-D24    | 0.411                 | 0.999                 | 0.939                |
| NEG-C24-M24    | 0.358                 | 0.981                 | 0.884                |
| NEG-D9-M9      | 0.256                 | 0.963                 | 0.757                |
| NEG-D24-M24    | 0.680                 | 1.000                 | 0.542                |

**Table S3.** The Metabolic pathway analysis results (using KEGG pathway database).

| Pathway Name                                | p         | -log(p) | Holm p    | FDR       | Impact  |
|---------------------------------------------|-----------|---------|-----------|-----------|---------|
| Arachidonic acid metabolism                 | 7.5309E-5 | 9.4939  | 0.0061    | 0.0050608 | 0.55495 |
| Sphingolipid metabolism                     | 1.2496E-4 | 8.9875  | 0.0099966 | 0.0050608 | 0.2782  |
| Glycerophospholipid metabolism              | 0.0068031 | 4.9904  | 0.53744   | 0.18027   | 0.11203 |
| Valine, leucine and isoleucine biosynthesis | 0.0089022 | 4.7215  | 0.69437   | 0.18027   | 0.66666 |
| Aminoacyl-tRNA biosynthesis                 | 0.058411  | 2.8402  | 1.0       | 0.94626   | 0.0     |
| Valine, leucine and isoleucine degradation  | 0.0916    | 2.3903  | 1.0       | 1.0       | 0.0     |
| Pantothenate and CoA biosynthesis           | 0.18593   | 1.6824  | 1.0       | 1.0       | 0.0     |
| Folate biosynthesis                         | 0.19708   | 1.6241  | 1.0       | 1.0       | 0.0     |
| Biosynthesis of unsaturated fatty acids     | 0.44105   | 0.81861 | 1.0       | 1.0       | 0.0     |
| Arginine and proline metabolism             | 0.45656   | 0.78404 | 1.0       | 1.0       | 0.08228 |

**Table S4.** The verification information of identified metabolites.

| NO | Metabolites                         | TR/min | m/z      | M.F                                                          | Adduct Type          | Matched MS/MS Pyrolysis Characteristic Fragment                      | Delta (ppm) | HMDB        |
|----|-------------------------------------|--------|----------|--------------------------------------------------------------|----------------------|----------------------------------------------------------------------|-------------|-------------|
| 1  | L-valine                            | 9.94   | 118.0848 | C <sub>5</sub> H <sub>11</sub> NO <sub>2</sub>               | M+H                  | 118.0868、100.0762、<br>72.0813、43.0547                                | 10          | HMDB0000883 |
| 2  | 2-Methylglutaric acid               | 9.62   | 129.0543 | C <sub>6</sub> H <sub>10</sub> O <sub>4</sub>                | M+H-H <sub>2</sub> O | 147.0647、131.0344、<br>129.0551、111.0446、<br>101.0602、73.0289         | 7           | HMDB0000422 |
| 3  | L-Isoleucine                        | 5.29   | 132.1013 | C <sub>6</sub> H <sub>13</sub> NO <sub>2</sub>               | M+H                  | 132.1013、114.3001、<br>86.2330、69.2003                                | 5           | HMDB0000172 |
| 4  | L-Arginine                          | 11.90  | 175.1186 | C <sub>6</sub> H <sub>14</sub> N <sub>4</sub> O <sub>2</sub> | M+H                  | 175.0592、158.7482、<br>140.1545、98.0538、72.0421、<br>59.9551           | 2           | HMDB00517   |
| 5  | Phosphorylcholine                   | 12.55  | 184.0731 | C <sub>5</sub> H <sub>15</sub> NO <sub>4</sub><br>P          | M+H                  | 184.0731、175.0233、<br>154.2013、135.0221、73.0014                      | 4           | HMDB01565   |
| 6  | 8-Hydroxy-7-methylguanine           | 11.98  | 223.0935 | C <sub>6</sub> H <sub>7</sub> N <sub>5</sub> O <sub>2</sub>  | M+ACN+H              | 182.0677、166.0364、<br>155.0569、139.0619、<br>111.0194、86.0354         | 1           | HMDB06037   |
| 7  | 4a-Carbinolaminetetrahydrobiopterin | 9.62   | 281.1355 | C <sub>9</sub> H <sub>13</sub> N <sub>5</sub> O <sub>3</sub> | M+ACN+H              | 240.1096、222.0990、<br>204.0885、166.0728、<br>139.0619、89.0602         | 1           | HMDB02215   |
| 8  | Oleamide                            | 12.44  | 282.2798 | C <sub>18</sub> H <sub>35</sub> NO                           | M+H                  | 282.2796、265.2531、<br>247.2425、181.1956、<br>139.1486、85.1017、57.0704 | 2           | HMDB0002117 |
| 9  | Sphinganine                         | 12.78  | 284.2956 | C <sub>18</sub> H <sub>39</sub> NO <sub>2</sub>              | M+H-H <sub>2</sub> O | 254.7790、95.2531、82.7310、<br>69.5770、54.7791                         | 1           | HMDB0000269 |
| 10 | Glycerophosphorylcholine            | 22.46  | 299.1370 | C <sub>8</sub> H <sub>20</sub> NO <sub>6</sub><br>P          | M+ACN+H              | 258.1101、240.0995、<br>222.0889、155.0103、<br>84.0807、75.0440、57.0334  | 1           | HMDB0000086 |
| 11 | Phytosphingosine                    | 9.73   | 318.2972 | C <sub>18</sub> H <sub>39</sub> NO <sub>3</sub>              | M+H                  | 318.3008、301、2742、<br>282.2796、197.2262、<br>71.0860、43.0183          | 10          | HMDB0004610 |
| 12 | Geranylgeranyl-cysteine             | 11.04  | 408.2590 | C <sub>23</sub> H <sub>37</sub> NO <sub>3</sub><br>S         | M+H                  | 408.2566、390.2461、<br>287.2369、245.2263、<br>122.0270、104.0164        | 6           | HMDB0011678 |
| 13 | Beta-tocopherol                     | 20.28  | 458.3973 | C <sub>28</sub> H <sub>48</sub> O <sub>2</sub>               | M+ACN+H              | 417.3727、399.3621、<br>197.2263、151.0753、                             | 4           | HMDB0006335 |
| 14 | LysoPC(18:2 (9Z,12Z))               | 11.43  | 502.3289 | C <sub>26</sub> H <sub>50</sub> NO <sub>7</sub><br>P         | M+H-H <sub>2</sub> O | 520.3407、502.3303、443、<br>2565、337.2750、184.0735、<br>104.1070        | 2           | HMDB0010386 |

|    |                                                  |       |          |                                        |                        |                                                               |    |             |
|----|--------------------------------------------------|-------|----------|----------------------------------------|------------------------|---------------------------------------------------------------|----|-------------|
| 15 | LysoPC(18:1<br>(9Z))                             | 16.79 | 506.3585 | $C_{26}H_{52}NO_6$<br>P                | M+H                    | 506.3605、403.2607、<br>323.2945、249.2576、<br>180.0420、88.1120  | 4  | HMDB0010408 |
| 16 | LysoPC(0:0/<br>18:0)                             | 16.81 | 524.3676 | $C_{26}H_{46}NO_7$<br>P                | M+H                    | 524.3710、506.3605、<br>240.0995、184.0733、<br>88.1120、84.0807   | 7  | HMDB0011128 |
| 17 | LysoPC(20:3<br>(5Z,8Z,11Z))                      | 16.79 | 528.3437 | $C_{28}H_{50}NO_7$<br>P                | M+H-H <sub>2</sub> O   | 546.3554、363.2893、<br>289.2525、247.2420、<br>240.0995、88.1120  | 3  | HMDB0010393 |
| 18 | Postin(Lys-<br>Pro-Pro-<br>Arg)                  | 12.42 | 529.3459 | $C_{22}H_{40}N_8O$<br>5                | M+CH <sub>3</sub> OH+H | 480.2928、286.1873、<br>167.1178、101.1073、<br>98.0600、70.0651   | 0  | HMDB0005772 |
| 19 | LysoPC(22:6<br>(4Z,7Z,10Z,1<br>3Z,16Z,19Z))      | 11.98 | 550.3278 | $C_{30}H_{52}NO_7$<br>P                | M+H-H <sub>2</sub> O   | 570.3554、387.2893、<br>313.2525、271.2420、<br>240.0995、88.1120  | 4  | HMDB0010404 |
| 20 | LysoPC(22:5<br>(4Z,7Z,10Z,1<br>3Z,16Z))          | 11.34 | 552.3448 | $C_{30}H_{50}NO_7$<br>P                | M+H-H <sub>2</sub> O   | 552.3554、387.2891、285.2536、<br>271.2422、240.0975、88.1121      | 1  | HMDB0010402 |
| 21 | 25-<br>Hydroxyvita<br>min- D2-25-<br>glucuronide | 11.98 | 571.3603 | $C_{34}H_{52}O_8$                      | M+H-H <sub>2</sub> O   | 571.3634、413.3419、<br>395.3313、311.2374、<br>277.2531、123.0809 | 6  | HMDB0010342 |
| 22 | Mesobilirubi<br>nogen                            | 11.98 | 593.3305 | $C_{33}H_{44}N_4O$<br>6                | M+H                    | 593.3336、575.3227、<br>547.3278、529.3173、<br>487.3067、124.0756 | 5  | HMDB0001898 |
| 23 | Kinetensin<br>4-7                                | 4.82  | 604.3261 | $C_{26}H_{37}N_9O$<br>6                | M+CH <sub>3</sub> OH+H | 555.2674、513.2456、<br>266.1723、207.1240、<br>129.1134、60.0556  | 10 | HMDB0012986 |
| 24 | Leukotriene<br>C4                                | 4.82  | 658.3340 | $C_{30}H_{47}N_3O$<br>9S               | M+CH <sub>3</sub> OH+H | 608.3005、580.3056、<br>523.2841、495.2528、<br>392.2259、74.0242  | 4  | HMDB0001198 |
| 25 | Kinetensin<br>4-8                                | 4.89  | 719.3584 | $C_{35}H_{46}N_{10}$<br>O <sub>7</sub> | M+H                    | 718.3551、702.3358、<br>363.2251、266.1723、<br>129.1134、112.0869 | 6  | HMDB0012987 |
| 26 | PS(14:0/14:1(<br>9Z))                            | 20.85 | 719.4602 | $C_{34}H_{64}NO_1$<br>oP               | M+ACN+H                | 660.4240、493.4256、<br>211.2061、88.0398、71.0133、<br>42.0343    | 1  | HMDB0012331 |
| 27 | Sphingosine                                      | 5.61  | 298.1358 | $C_{18}H_{37}NO_2$                     | M-H                    | 298.2746、280.2640、<br>250.2534、60.0449、42.0343                | 4  | HMDB000252  |
| 28 | 3-<br>dehydrosphi<br>nganine                     | 18.69 | 298.3111 | $C_{18}H_{37}NO_2$                     | M-H                    | 298.3106、280.2540、<br>266.2483、250.2534、<br>58.0292、          | 3  | HMDB0001480 |
| 29 | Arachidonic<br>acid                              | 19.99 | 303.957  | $C_{20}H_{32}O_2$                      | M-H                    | 303.2342、259.2430、<br>205.1061、59.0169                        | 2  | HMDB0001043 |

|    |                                                   |       |          |                                                |                      |                                                              |   |             |
|----|---------------------------------------------------|-------|----------|------------------------------------------------|----------------------|--------------------------------------------------------------|---|-------------|
| 30 | Leukotriene<br>A4                                 | 13.40 | 317.2079 | C <sub>20</sub> H <sub>30</sub> O <sub>3</sub> | M-H                  | 317.2146、299.2048、<br>255.2124、59.0216、                      | 1 | HMDB01337   |
| 31 | 12-Keto-<br>tetrahydro-<br>leukotriene<br>B4      | 12.93 | 319.2266 | C <sub>20</sub> H <sub>34</sub> O <sub>4</sub> | M-H <sub>2</sub> O-H | 337.2384、293.2486、<br>275.2380、221.1183、<br>155.1443、59.0138 | 2 | HMDB02995   |
| 32 | 5(S)-<br>Hydroperox<br>yeicosatetrae<br>noic acid | 10.93 | 335.2189 | C <sub>20</sub> H <sub>32</sub> O <sub>4</sub> | M-H                  | 335.2130、317.2334、289.2373                                   | 2 | HMDB0001193 |

Table S5. CV-ANOVA of 12 OPLS-DA score plots.

| POS-C9-M9          | SS    | DF | MS    | F     | p        | SD    | NEG-C9-M9          | SS    | DF | MS    | F     | p        | SD    |
|--------------------|-------|----|-------|-------|----------|-------|--------------------|-------|----|-------|-------|----------|-------|
| <b>Total corr.</b> | 19    | 19 | 1     |       |          | 1     | <b>Total corr.</b> | 19    | 19 | 1     |       |          | 1     |
| <b>Regression</b>  | 18.27 | 4  | 4.57  | 93.50 | 2.04E-10 | 2.14  | <b>Regression</b>  | 17.77 | 4  | 4.44  | 54.34 | 9.52E-09 | 2.11  |
| <b>Residual</b>    | 0.73  | 15 | 0.049 |       |          | 0.221 | <b>Residual</b>    | 1.23  | 15 | 0.082 |       |          | 0.286 |
| POS-C9-P9          | SS    | DF | MS    | F     | p        | SD    | NEG-C9-P9          | SS    | DF | MS    | F     | p        | SD    |
| <b>Total corr.</b> | 19    | 19 | 1     |       |          | 1     | <b>Total corr.</b> | 19    | 19 | 1     |       |          | 1     |
| <b>Regression</b>  | 18.07 | 6  | 3.01  | 42.28 | 8.66E-08 | 1.74  | <b>Regression</b>  | 18.28 | 6  | 3.05  | 55.17 | 1.69E-08 | 1.75  |
| <b>Residual</b>    | 0.93  | 13 | 0.071 |       |          | 0.267 | <b>Residual</b>    | 0.72  | 13 | 0.055 |       |          | 0.235 |
| POS-P9-M9          | SS    | DF | MS    | F     | p        | SD    | NEG-P9-M9          | SS    | DF | MS    | F     | p        | SD    |
| <b>Total corr.</b> | 19    | 19 | 1     |       |          | 1     | <b>Total corr.</b> | 19    | 19 | 1     |       |          | 1     |
| <b>Regression</b>  | 16.22 | 4  | 4.06  | 21.92 | 4.01E-06 | 2.01  | <b>Regression</b>  | 14.39 | 4  | 3.60  | 11.71 | 1.63E-05 | 1.90  |
| <b>Residual</b>    | 2.78  | 15 | 0.185 |       |          | 0.430 | <b>Residual</b>    | 4.61  | 15 | 0.307 |       |          | 0.554 |
| POS-C24-M24        | SS    | DF | MS    | F     | p        | SD    | NEG-C24-M24        | SS    | DF | MS    | F     | p        | SD    |
| <b>Total corr.</b> | 19    | 19 | 1     |       |          | 1     | <b>Total corr.</b> | 19    | 19 | 1     |       |          | 1     |
| <b>Regression</b>  | 18.01 | 4  | 4.50  | 67.90 | 1.99E-09 | 2.12  | <b>Regression</b>  | 16.96 | 4  | 4.24  | 31.24 | 4.09E-07 | 2.06  |
| <b>Residual</b>    | 0.99  | 15 | 0.066 |       |          | 0.257 | <b>Residual</b>    | 2.04  | 15 | 0.136 |       |          | 0.368 |
| POS-C24-P24        | SS    | DF | MS    | F     | p        | SD    | NEG-C24-P24        | SS    | DF | MS    | F     | p        | SD    |
| <b>Total corr.</b> | 19    | 19 | 1     |       |          | 1     | <b>Total corr.</b> | 19    | 19 | 1     |       |          | 1     |
| <b>Regression</b>  | 18.17 | 4  | 4.54  | 82.33 | 5.08E-10 | 2.13  | <b>Regression</b>  | 17.85 | 6  | 2.97  | 33.61 | 3.48E-07 | 1.72  |
| <b>Residual</b>    | 0.83  | 15 | 0.055 |       |          | 0.235 | <b>Residual</b>    | 1.15  | 13 | 0.089 |       |          | 0.298 |
| POS-P24-M24        | SS    | DF | MS    | F     | p        | SD    | NEG-P24-M24        | SS    | DF | MS    | F     | p        | SD    |
| <b>Total corr.</b> | 19    | 19 | 1     |       |          | 1     | <b>Total corr.</b> | 19    | 19 | 1     |       |          | 1     |
| <b>Regression</b>  | 14.62 | 6  | 2.44  | 7.24  | 1.46E-03 | 1.56  | <b>Regression</b>  | 10.31 | 10 | 1.03  | 1.07  | 4.65E-02 | 1.02  |
| <b>Residual</b>    | 4.38  | 13 | 0.337 |       |          | 0.580 | <b>Residual</b>    | 8.69  | 9  | 0.965 |       |          | 0.982 |

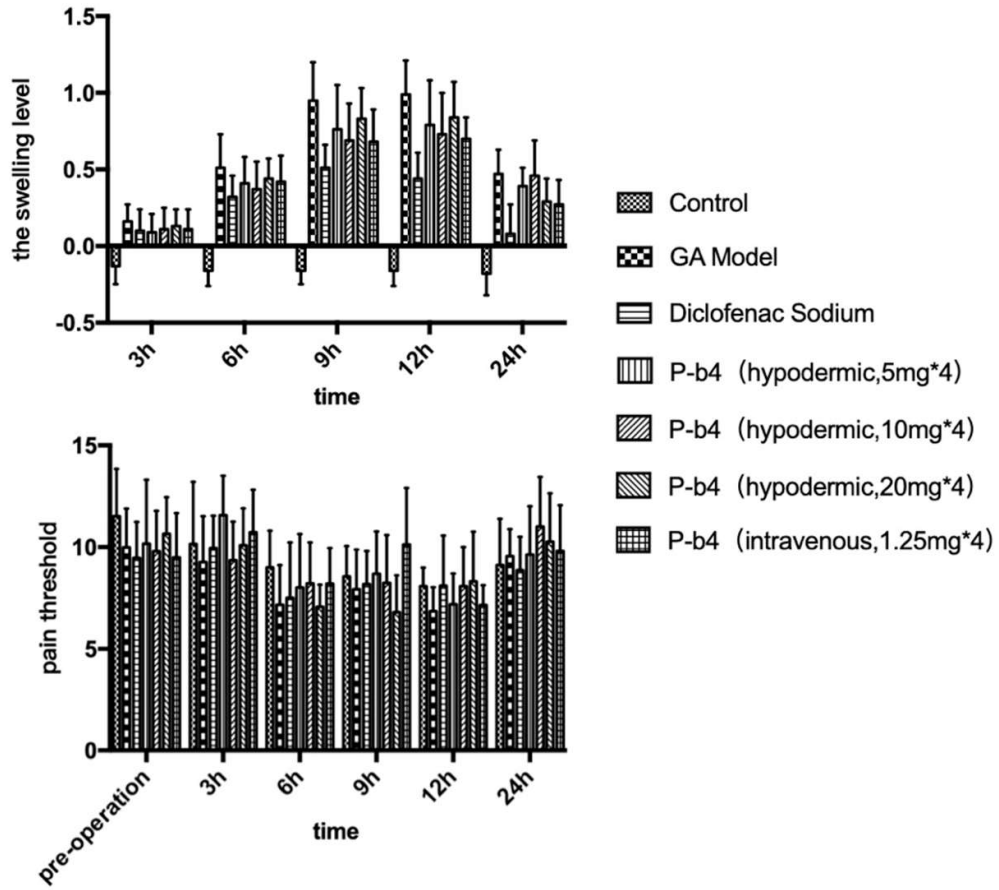

Figure S1. The bar plot of the value of each group on toes/ankle swelling and pain threshold.



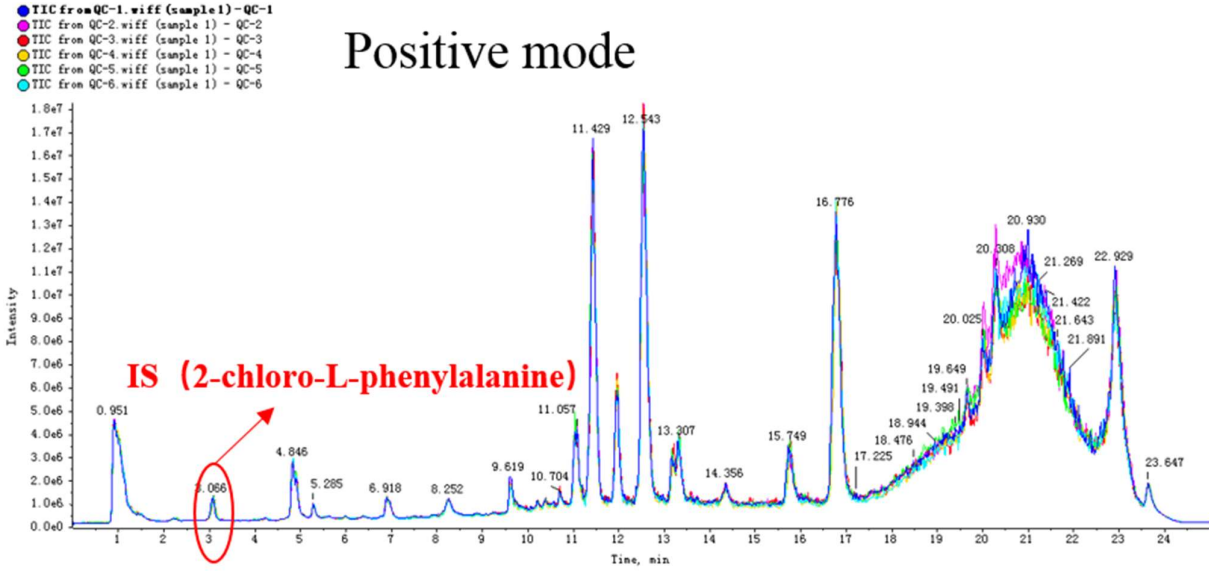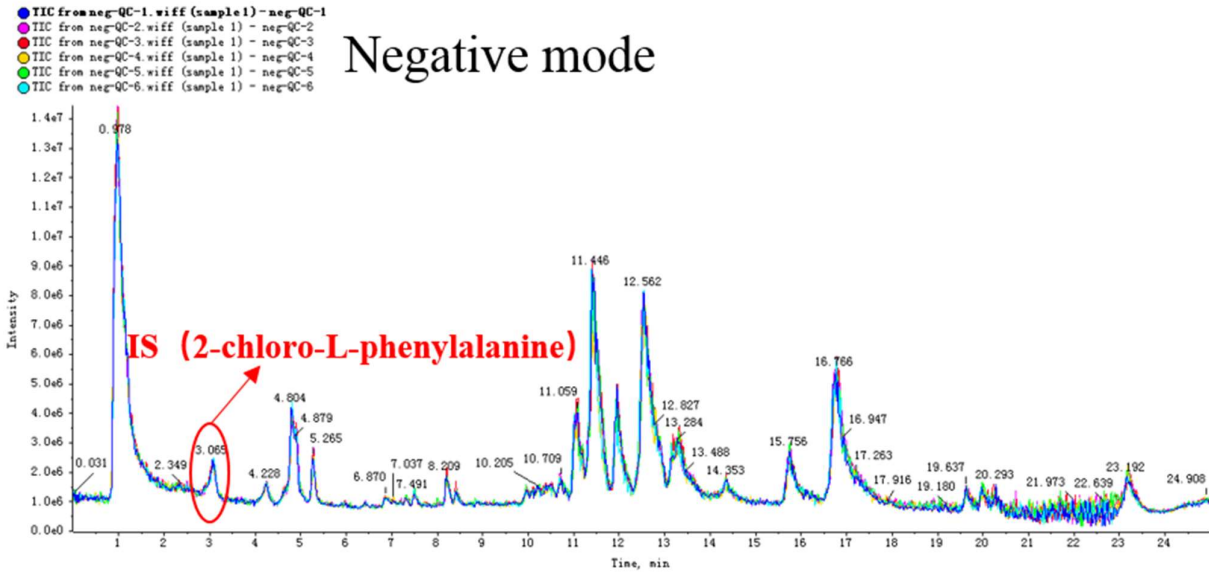

Figure S2. TICs of 6 QC samples.

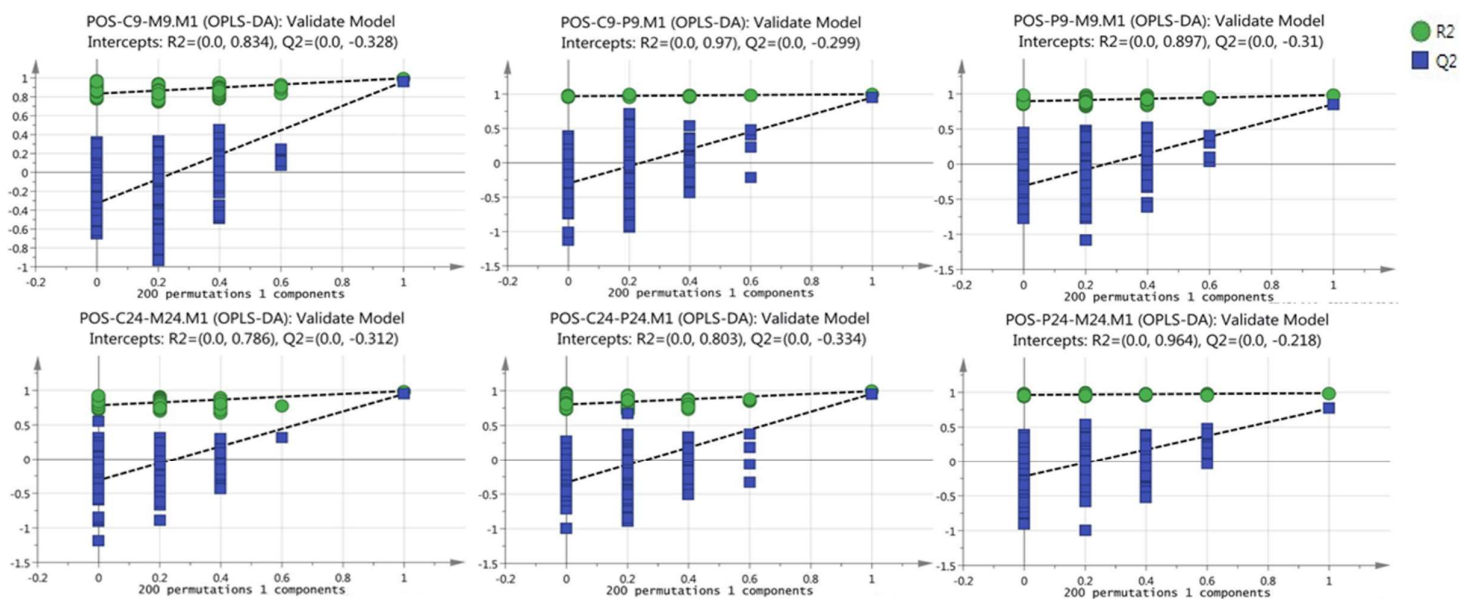

A

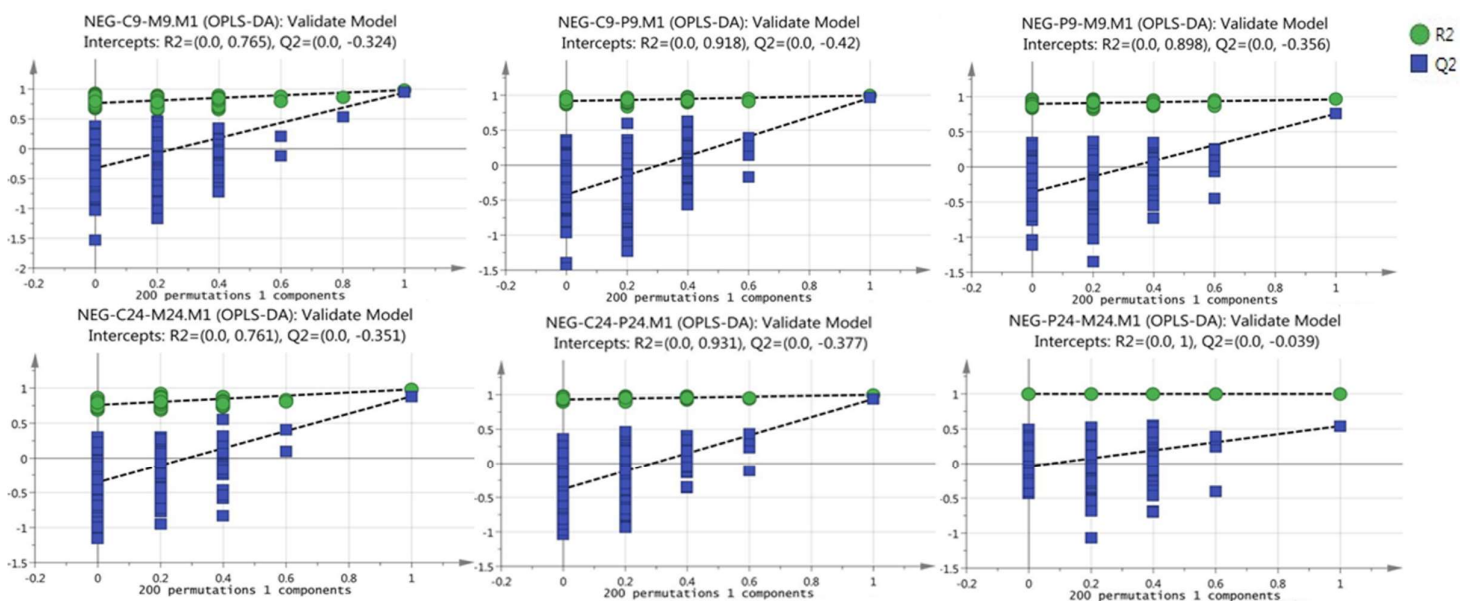

B

**Figure S3.** The permutation of 200 tests of 12 OPLS-DA models. A: positive ion mode; B: negative ion mode.
